# Supplementary material for: Anti-Neurodegenerating Activity: Structure–Activity Relationship Analysis of Flavonoids
Source: MDPI journal article supplement (doi:10.3390/molecules28207188), 2023-10-20
Supplement: s1 [file s1]

# Supplementary Information

## Anti-Neurodegenerating Activity: Structure–Activity Relationship Analysis of Flavonoids

Gagan Preet <sup>1,†</sup>, Ahlam Haj Hasan <sup>1,2,†</sup>, Piteesha Ramlagan <sup>3</sup>, Shameem Fawdar <sup>3</sup>, Fabien Boulle <sup>3</sup> and Marcel Jaspars <sup>1,\*</sup>

- <sup>1</sup> Marine Biodiscovery Centre, Department of Chemistry, University of Aberdeen, Aberdeen AB24 3UE, UK; gagan.preet1@abdn.ac.uk (G.P.); a.hajhasan.20@abdn.ac.uk (A.H.H.)
- <sup>2</sup> Department of Medicinal Chemistry and Pharmacognosy, Faculty of Pharmacy, Jordan University of Science and Technology, Irbid 22110, Jordan
- <sup>3</sup> Axonova Ltd., Grand Port 51405, Mauritius; p.ramlagan@axonova-pharma.com (P.R.); s.fawdar@axonova-pharma.com (S.F.); f.boulle@axonova-pharma.com (F.B.)
- \* Correspondence: m.jaspars@abdn.ac.uk
- † These authors contributed equally to this work.

### List of contents

|                                                                                                                                                                                                                                                                                                 |    |
|-------------------------------------------------------------------------------------------------------------------------------------------------------------------------------------------------------------------------------------------------------------------------------------------------|----|
| <b>Figure S1.</b> Chemical structures of Flavonoids used in this study.                                                                                                                                                                                                                         | 3  |
| <b>Figure S2.</b> Structure similarity of the most structurally related flavonoids in the present study using DataWarrior Software.                                                                                                                                                             | 5  |
| <b>Figure S3.</b> ClogP Values of compounds from table S2.                                                                                                                                                                                                                                      | 9  |
| <b>Figure S4.</b> 3D and 2D representations of pharmacophoric features of the hypothetical compounds (5A – 5Q) used in 3D pharmacophore generation.                                                                                                                                             | 12 |
| <b>Table S1.</b> Values the highest non-cytotoxic dose of the 80 flavonoids. The Neuro-differentiating activity of the compounds was categorised as poor, medium, or high. (Results provided by Axonova).                                                                                       | 5  |
| <b>Table S2</b> ClogP Values were generated (using Ligand Scout Software) to check the solubility and TPSA values of the compounds in the SAR study.                                                                                                                                            | 8  |
| <b>Table S3.</b> The presence of more hydroxyl groups in the 14 flavonoid structure increases the neuro-differentiating activity.                                                                                                                                                               | 9  |
| <b>Table S4.</b> Fewer hydroxyl groups in the 19 flavonoid structures give poor neuro-differentiating activity.                                                                                                                                                                                 | 10 |
| <b>Table S5.</b> The presence of one or more than one hydroxyl or methoxy substitution at the C5 and C7 position of Ring A and C4' position of Ring B of nine flavonoids shows higher activity; the absence of hydroxyl groups at the C5 and C7 position of 8 compounds showing lower activity. | 10 |
| <b>Table S6.</b> Flavonoids (4), (5) & (23) show antioxidant activity; position C5, C7, C3', and C4' hydroxylation exhibits solid antioxidant property.                                                                                                                                         | 11 |

|                                                                                                                                                                                                                                         |    |
|-----------------------------------------------------------------------------------------------------------------------------------------------------------------------------------------------------------------------------------------|----|
| <b>Table S7.</b> Compound (5) shows excellent anti-inflammatory activity compared to the other two compounds (4) & (23) because 3'-hydroxylation taking place along with 7-methoxylation greatly enhances anti-inflammatory properties. | 12 |
| <b>(Method S4.2)</b> Protocol for determining the highest non-cytotoxic dose of the compounds by the MTT assay <i>(Provided by Axonova)</i> .                                                                                           | 16 |
| <b>(Method S4.3)</b> Protocol for shortlisting the hits candidate with neurotrophic activity <i>(Provided by Axonova)</i> .                                                                                                             | 17 |
| <b>(Method S4.4)</b> Protocol for assessing the neurotrophic and synaptogenic activities of the hit candidates by HCS <i>(Provided by Axonova)</i> .                                                                                    | 17 |
| <b>(Method S4.5)</b> Compound and insult treatment on differentiated SH-SY5Y cells <i>(Provided by Axonova)</i> .                                                                                                                       | 18 |
| <b>Method S4.5.1)</b> Assessment of cell viability and ROS production <i>(Provided by Axonova)</i> .                                                                                                                                    | 19 |
| <b>(Method S4.5.2)</b> Determination of neurite loss <i>(Provided by Axonova)</i> .                                                                                                                                                     | 19 |
| <b>(Method S4.5.3)</b> Investigation of secretion of TNF $\alpha$ and IL-1 $\beta$ <i>(Provided by Axonova)</i> .                                                                                                                       | 19 |

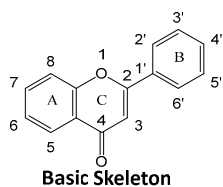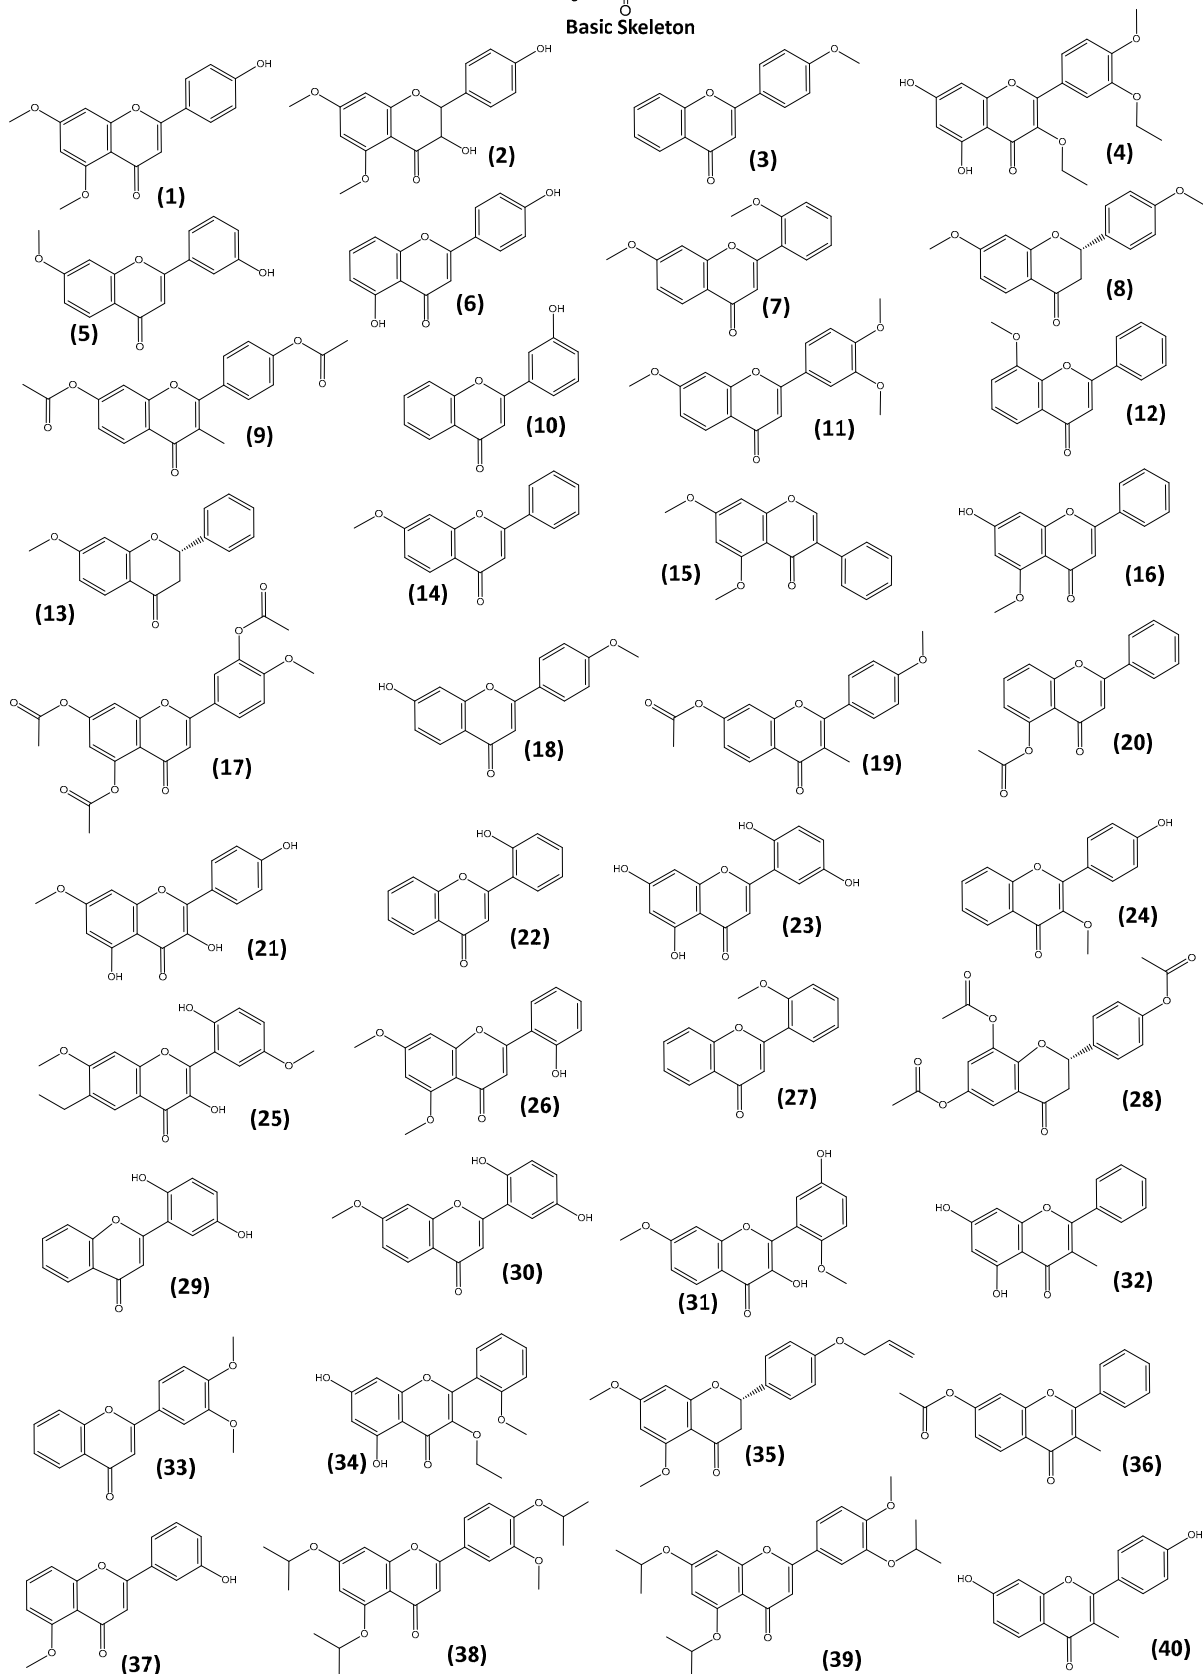

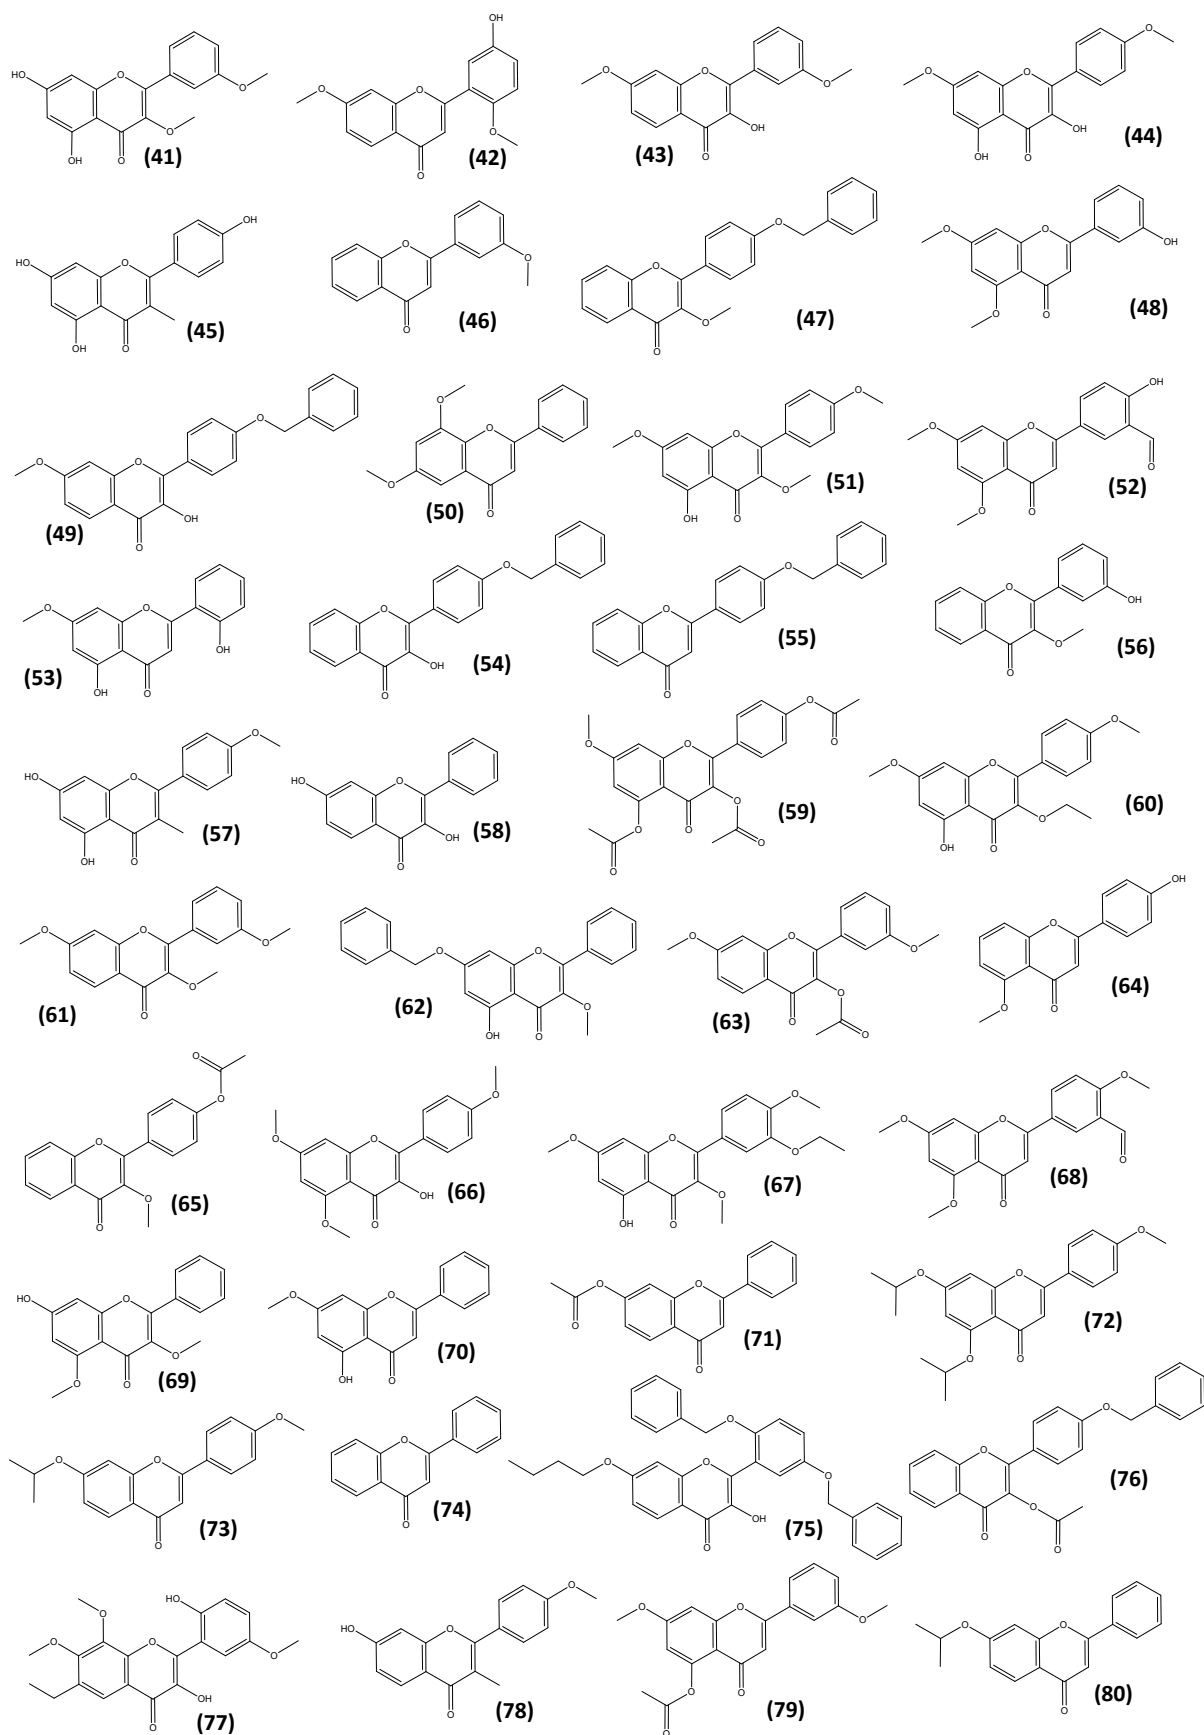

Figure S1. Chemical structures of Flavonoids used in this study.

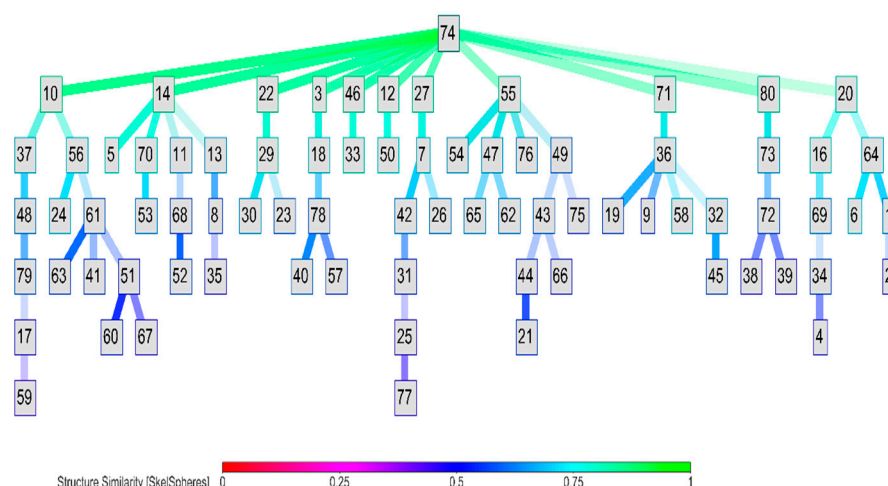

**Figure. S2** Structure similarity of the most structurally related flavonoids in the present study using DataWarrior Software [71]. DataWarrior software calculates a similarity value between the molecules in a two-step process. Firstly, certain molecular features are extracted by processing the molecular graphs of the dataset consisting all molecules. These are gathered into an abstract molecule description called a descriptor. In simple terms, the descriptor comprises of a binary array of which every bit express whether a specific feature is situated in the molecule. These binary descriptors can also be termed as fingerprints. In the second step, the descriptors of the molecules are compared with some logic to establish the true similarity value, which indicates how much the two compounds have in common. In the case of binary descriptor, DataWarrior divides the total number of common features by the number of features available in any of the two molecules. This is referred to as Tanimoto similarity. The structural similarity was identified using Datawarrior software, where the flavone skeleton was identified as starting marker, and Skelspheres was used as a molecular descriptor to find the close similarity between the structures. Skelspheres descriptors are used to achieve the best clustering or similarity analysis results. When a more fine structural similarity is required, the SkeletonSpheres descriptor should be adopted. It is associated to the SphereFp, but also recognise stereochemistry, counts duplicate frag-ments, conceals hetero-atom reduced skeletons, and has two times the resolution lead-ing to lesser hash collisions. It is the most authentic descriptor for calculating the simi-larities of chemical graphs. [71]

**Table S1.** Values the highest non-cytotoxic dose of the 80 flavonoids. The Neuro-differentiating activity of the compounds was categorised as poor, medium, or high. (Results provided by Axonova)

| S.No. | Compound | Highest non-toxic dose | Neuro-differentiating ability |
|-------|----------|------------------------|-------------------------------|
| 1     | 1        | 1 nM                   | Poor                          |
| 2     | 2        | 10 nM                  | Poor                          |
| 3     | 3        | 1 $\mu$ M              | Poor                          |
| 4     | 4        | 1 $\mu$ M              | High                          |
| 5     | 5        | 1 nM                   | High                          |
| 6     | 6        | 1 $\mu$ M              | High                          |
| 7     | 7        | 100 pM                 | Medium                        |
| 8     | 8        | 1 $\mu$ M              | High                          |
| 9     | 9        | 1 nM                   | Poor                          |
| 10    | 10       | Toxic at 100 pM        | Poor                          |

|    |    |                 |        |
|----|----|-----------------|--------|
| 11 | 11 | 10 nM           | Poor   |
| 12 | 12 | Toxic at 100 pM | Poor   |
| 13 | 13 | 1 $\mu$ M       | Poor   |
| 14 | 14 | 1 $\mu$ M       | Poor   |
| 15 | 15 | 100 nM          | Poor   |
| 16 | 16 | 100 nM          | Poor   |
| 17 | 17 | 1 nM            | Poor   |
| 18 | 18 | 1 nM            | High   |
| 19 | 19 | 10 $\mu$ M      | Poor   |
| 20 | 20 | 100 pM          | Poor   |
| 21 | 21 | 100 pM          | Medium |
| 22 | 22 | 1 nM            | Medium |
| 23 | 23 | 1 $\mu$ M       | High   |
| 24 | 24 | 1 nM            | High   |
| 25 | 25 | 1 nM            | High   |
| 26 | 26 | 1 $\mu$ M       | Poor   |
| 27 | 27 | 10 $\mu$ M      | Poor   |
| 28 | 28 | 1 $\mu$ M       | Poor   |
| 29 | 29 | 10 nM           | High   |
| 30 | 30 | 1 $\mu$ M       | Poor   |
| 31 | 31 | 1 $\mu$ M       | High   |
| 32 | 32 | 1 $\mu$ M       | High   |
| 33 | 33 | 10 $\mu$ M      | Poor   |
| 34 | 34 | 10 $\mu$ M      | Poor   |
| 35 | 35 | 1 $\mu$ M       | Poor   |
| 36 | 36 | 10 $\mu$ M      | Poor   |
| 37 | 37 | 10 nM           | High   |
| 38 | 38 | 10 $\mu$ M      | Poor   |
| 39 | 39 | 10 $\mu$ M      | Poor   |
| 40 | 40 | 1 $\mu$ M       | High   |
| 41 | 41 | 10 nM           | High   |
| 42 | 42 | 1 $\mu$ M       | Medium |
| 43 | 43 | 1 $\mu$ M       | Medium |
| 44 | 44 | 1 $\mu$ M       | Medium |
| 45 | 45 | 1 nM            | Poor   |
| 46 | 46 | 1 nM            | Medium |
| 47 | 47 | 10 nM           | Medium |

|    |    |                 |        |
|----|----|-----------------|--------|
| 48 | 48 | 1 $\mu$ M       | Poor   |
| 49 | 49 | 1 nM            | Poor   |
| 50 | 50 | 100 nM          | Poor   |
| 51 | 51 | 1 nM            | Poor   |
| 52 | 52 | 100 nM          | Poor   |
| 53 | 53 | 100 pM          | Poor   |
| 54 | 54 | 100 pM          | Poor   |
| 55 | 55 | 1 nM            | Poor   |
| 56 | 56 | Toxic at 100 pM | Poor   |
| 57 | 57 | 100 pM          | High   |
| 58 | 58 | 100 pM          | Medium |
| 59 | 59 | 100 pM          | Medium |
| 60 | 60 | 100 pM          | Medium |
| 61 | 61 | 100 pM          | Poor   |
| 62 | 62 | 1 nM            | Poor   |
| 63 | 63 | 1 $\mu$ M       | High   |
| 64 | 64 | 10 nM           | High   |
| 65 | 65 | 100 pM          | Medium |
| 66 | 66 | 10 nM           | Medium |
| 67 | 67 | 100 pM          | Medium |
| 68 | 68 | 10 nM           | Medium |
| 69 | 69 | 1 nM            | Medium |
| 70 | 70 | 1 $\mu$ M       | High   |
| 71 | 71 | 100 pM          | High   |
| 72 | 72 | 1 $\mu$ M       | High   |
| 73 | 73 | 100 nM          | Medium |
| 74 | 74 | 10 nM           | High   |
| 75 | 75 | 100 nM          | High   |
| 76 | 76 | 10 nM           | High   |
| 77 | 77 | 1 $\mu$ M       | Medium |
| 78 | 78 | 1 $\mu$ M       | Medium |
| 79 | 79 | 100 nM          | Medium |
| 80 | 80 | 1 nM            | Medium |

**Table S2.** ClogP Values were generated (using Ligand Scout Software) to check the solubility and TPSA values of the compounds in the SAR study.

| Compound | MolWt  | Acceptors | Donors | Rings | Rot. Bonds | cLogP | Rel. TPSA |
|----------|--------|-----------|--------|-------|------------|-------|-----------|
| 3        | 252.27 | 2         | 0      | 3     | 3          | 3.47  | 1.27      |
| 4        | 372.37 | 6         | 2      | 3     | 11         | 3.68  | 2.09      |
| 5        | 268.27 | 3         | 1      | 3     | 4          | 3.17  | 1.86      |
| 6        | 254.24 | 3         | 2      | 3     | 3          | 2.87  | 2.44      |
| 9        | 352.34 | 5         | 0      | 3     | 8          | 3.62  | 1.97      |
| 10       | 238.24 | 2         | 1      | 3     | 2          | 3.17  | 1.8       |
| 11       | 312.32 | 4         | 0      | 3     | 7          | 3.49  | 1.48      |
| 12       | 252.27 | 2         | 0      | 3     | 3          | 3.47  | 1.27      |
| 14       | 252.27 | 2         | 0      | 3     | 3          | 3.47  | 1.27      |
| 17       | 426.38 | 8         | 0      | 3     | 12         | 3.24  | 2.42      |
| 18       | 268.27 | 3         | 1      | 3     | 4          | 3.17  | 1.86      |
| 19       | 324.33 | 4         | 0      | 3     | 7          | 3.7   | 1.64      |
| 20       | 280.28 | 3         | 0      | 3     | 4          | 3.39  | 1.71      |
| 23       | 286.24 | 5         | 4      | 3     | 5          | 2.28  | 3.58      |
| 24       | 268.27 | 3         | 1      | 3     | 4          | 3.17  | 1.86      |
| 26       | 298.29 | 4         | 1      | 3     | 6          | 3.18  | 1.91      |
| 27       | 252.27 | 2         | 0      | 3     | 3          | 3.47  | 1.27      |
| 29       | 254.24 | 3         | 2      | 3     | 3          | 2.87  | 2.44      |
| 30       | 284.27 | 4         | 2      | 3     | 5          | 2.88  | 2.42      |
| 32       | 268.27 | 3         | 2      | 3     | 4          | 3.18  | 2.21      |
| 33       | 282.29 | 3         | 0      | 3     | 5          | 3.48  | 1.39      |
| 36       | 294.31 | 3         | 0      | 3     | 5          | 3.69  | 1.57      |
| 37       | 268.27 | 3         | 1      | 3     | 4          | 3.17  | 1.86      |
| 38       | 426.51 | 5         | 0      | 3     | 15         | 5.83  | 1.1       |
| 39       | 426.51 | 5         | 0      | 3     | 15         | 5.83  | 1.1       |
| 40       | 268.27 | 3         | 2      | 3     | 4          | 3.18  | 2.21      |
| 41       | 314.29 | 5         | 2      | 3     | 7          | 2.89  | 2.41      |
| 50       | 282.29 | 3         | 0      | 3     | 5          | 3.48  | 1.39      |
| 61       | 312.32 | 4         | 0      | 3     | 7          | 3.49  | 1.48      |
| 63       | 340.33 | 5         | 0      | 3     | 8          | 3.4   | 1.83      |
| 67       | 372.37 | 6         | 1      | 3     | 11         | 3.59  | 1.86      |
| 70       | 268.27 | 3         | 1      | 3     | 4          | 3.17  | 1.86      |
| 76       | 386.4  | 4         | 0      | 4     | 7          | 4.68  | 1.4       |



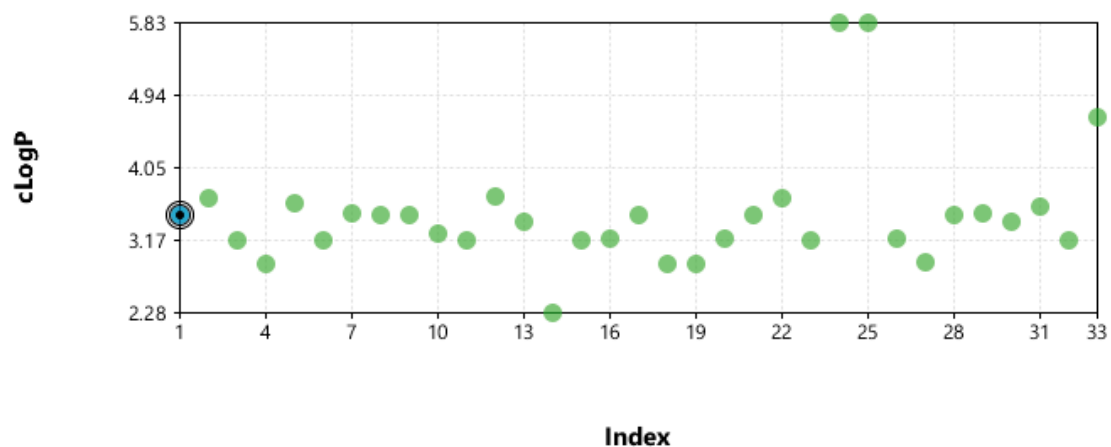

**Figure S3.** ClogP Values of compounds from table S2.

**Table S3** The presence of more hydroxyl groups in the 14 flavonoid structure increases the neuro-differentiating activity.

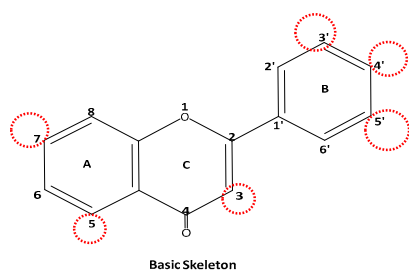

|          | Ring C                           | Ring A           |                  | Ring B |                  |                                  |
|----------|----------------------------------|------------------|------------------|--------|------------------|----------------------------------|
| Compound | C3                               | C5               | C7               | C3'    | C4'              | C5'                              |
| 4        | OCH <sub>2</sub> CH <sub>3</sub> | OH               | OH               |        | OCH <sub>3</sub> | OCH <sub>2</sub> CH <sub>3</sub> |
| 5        |                                  |                  | OCH <sub>3</sub> | OH     |                  |                                  |
| 6        |                                  | OH               |                  |        | OH               |                                  |
| 18       |                                  |                  | OH               |        | OCH <sub>3</sub> |                                  |
| 23       |                                  | OH               | OH               |        |                  | OH                               |
| 24       | OCH <sub>3</sub>                 |                  |                  |        | OH               |                                  |
| 29       |                                  |                  |                  |        | OH               |                                  |
| 32       | CH <sub>3</sub>                  | OH               | OH               |        |                  |                                  |
| 37       |                                  |                  |                  |        |                  | OH                               |
| 40       | CH <sub>3</sub>                  |                  | OH               |        | OH               |                                  |
| 41       | OCH <sub>3</sub>                 | OH               | OH               |        |                  | OCH <sub>3</sub>                 |
| 57       | CH <sub>3</sub>                  | OH               | OH               |        |                  | OCH <sub>3</sub>                 |
| 64       |                                  | OCH <sub>3</sub> |                  |        | OH               |                                  |
| 70       |                                  | OH               | OCH <sub>3</sub> |        |                  |                                  |

**Table S4** Fewer hydroxyl groups in the 19 flavonoid structure give poor neuro-differentiating activity.

|          | Ring C          | Ring A           |                  | Ring B |                                                   |                  |
|----------|-----------------|------------------|------------------|--------|---------------------------------------------------|------------------|
| Compound | C3              | C5               | C7               | C3'    | C4'                                               | C5'              |
| 3        |                 |                  |                  |        | OCH <sub>3</sub>                                  |                  |
| 9        | CH <sub>3</sub> |                  | OAc              |        | OAc                                               |                  |
| 10       |                 |                  |                  | OH     |                                                   |                  |
| 11       |                 |                  | OCH <sub>3</sub> |        | OCH <sub>3</sub>                                  | OCH <sub>3</sub> |
| 12       |                 |                  |                  |        |                                                   |                  |
| 14       |                 |                  | OCH <sub>3</sub> |        |                                                   |                  |
| 17       |                 | OAc              | OAc              |        | OAc                                               | OCH <sub>3</sub> |
| 19       | CH <sub>3</sub> |                  | OAc              |        |                                                   | OCH <sub>3</sub> |
| 20       |                 | OAc              |                  |        |                                                   |                  |
| 26       |                 | OCH <sub>3</sub> | OCH <sub>3</sub> |        |                                                   |                  |
| 27       |                 |                  |                  |        |                                                   |                  |
| 30       |                 |                  | OCH <sub>3</sub> |        |                                                   |                  |
| 33       |                 |                  |                  |        | OCH <sub>3</sub>                                  | OCH <sub>3</sub> |
| 36       | CH <sub>3</sub> |                  | OAc              |        |                                                   |                  |
| 38       |                 | O-nPr            | O-nPr            |        | O-nPr                                             | OCH <sub>3</sub> |
| 39       |                 | O-nPr            | O-nPr            |        | OCH <sub>3</sub>                                  | O-nPr            |
| 50       |                 |                  |                  |        |                                                   |                  |
| 55       |                 |                  |                  |        | OCH <sub>2</sub> (C <sub>6</sub> H <sub>6</sub> ) |                  |
| 61       |                 |                  | OCH <sub>3</sub> |        |                                                   | OCH <sub>3</sub> |

**Table S5** The presence of one or more than one hydroxyl or methoxy substitution at the C5 and C7 position of Ring A and C4' position of Ring B of nine flavonoids shows higher activity; the absence of hydroxyl groups at the C5 and C7 position of 8 compounds showing lower activity.

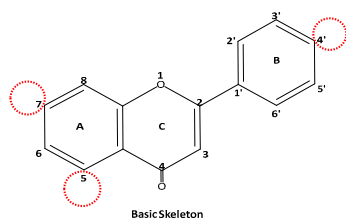

|          | Ring C                           | Ring A |                  | Ring B |                  |                                  |
|----------|----------------------------------|--------|------------------|--------|------------------|----------------------------------|
| Compound | C3                               | C5     | C7               | C3'    | C4'              | C5'                              |
| 4        | OCH <sub>2</sub> CH <sub>3</sub> | OH     | OH               |        | OCH <sub>3</sub> | OCH <sub>2</sub> CH <sub>3</sub> |
| 5        |                                  |        | OCH <sub>3</sub> | OH     |                  |                                  |

|    |                  |                                                   |                                                   |  |                                                   |                  |
|----|------------------|---------------------------------------------------|---------------------------------------------------|--|---------------------------------------------------|------------------|
| 6  |                  | OH                                                |                                                   |  | OH                                                |                  |
| 18 |                  |                                                   | OH                                                |  | OCH <sub>3</sub>                                  |                  |
| 23 |                  | OH                                                | OH                                                |  |                                                   | OH               |
| 24 | OCH <sub>3</sub> |                                                   |                                                   |  | OH                                                |                  |
| 29 |                  |                                                   |                                                   |  | OH                                                |                  |
| 32 | CH <sub>3</sub>  | OH                                                | OH                                                |  |                                                   |                  |
| 37 |                  |                                                   |                                                   |  |                                                   | OH               |
| 40 | CH <sub>3</sub>  |                                                   | OH                                                |  | OH                                                |                  |
| 41 | OCH <sub>3</sub> | OH                                                | OH                                                |  |                                                   | OCH <sub>3</sub> |
| 57 | CH <sub>3</sub>  | OH                                                | OH                                                |  |                                                   | OCH <sub>3</sub> |
| 64 |                  | OCH <sub>3</sub>                                  |                                                   |  | OH                                                |                  |
| 70 |                  | OH                                                | OCH <sub>3</sub>                                  |  |                                                   |                  |
| 63 | OAc              |                                                   | OCH <sub>3</sub>                                  |  |                                                   | OCH <sub>3</sub> |
| 71 |                  |                                                   | OAc                                               |  |                                                   |                  |
| 72 |                  | OCH <sub>2</sub> (C <sub>2</sub> H <sub>5</sub> ) | OCH <sub>2</sub> (C <sub>2</sub> H <sub>5</sub> ) |  | OCH <sub>3</sub>                                  |                  |
| 74 |                  |                                                   |                                                   |  |                                                   |                  |
| 76 | OAc              |                                                   |                                                   |  | OCH <sub>2</sub> (C <sub>6</sub> H <sub>6</sub> ) |                  |
|    |                  |                                                   |                                                   |  | Higher Activity                                   | Lower Activity   |

**Table.S6** Flavonoids (4), (5) & (23) show antioxidant activity; position C5, C7, C3', and C4' hydroxylation exhibits solid antioxidant property.

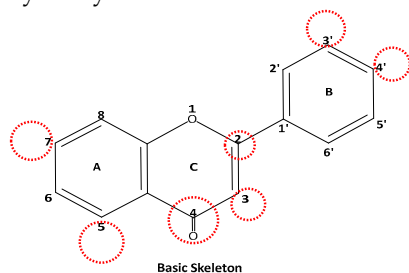

|          | Ring A |                  | Ring B |                  |
|----------|--------|------------------|--------|------------------|
| Compound | C5     | C7               | C3'    | C4'              |
| 4        | OH     | OH               |        | OCH <sub>3</sub> |
| 5        |        | OCH <sub>3</sub> | OH     |                  |
| 23       | OH     | OH               |        |                  |

**Table.S7** Compound (5) shows excellent anti-inflammatory activity compared to the other two compounds (4) & (23) because 3'-hydroxylation taking place along with 7-methoxylation greatly enhances anti-inflammatory properties

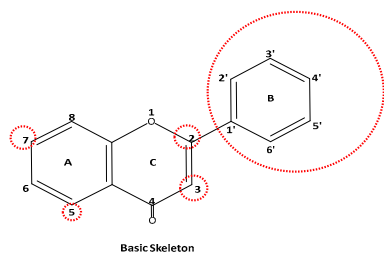

|          | Ring A |                  | Ring B |     |                  |                                  |
|----------|--------|------------------|--------|-----|------------------|----------------------------------|
| Compound | C5     | C7               | C2'    | C3' | C4'              | C5'                              |
| 4        | OH     | OH               |        |     | OCH <sub>3</sub> | OCH <sub>2</sub> CH <sub>3</sub> |
| 5        |        | OCH <sub>3</sub> |        | OH  |                  |                                  |
| 23       | OH     | OH               | OH     |     |                  | OH                               |

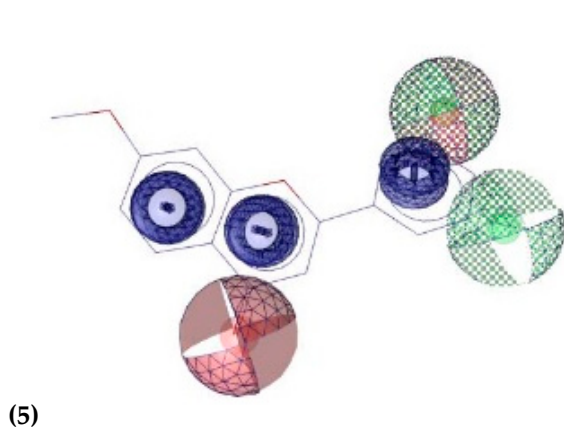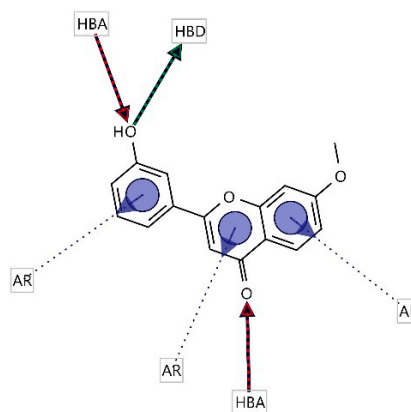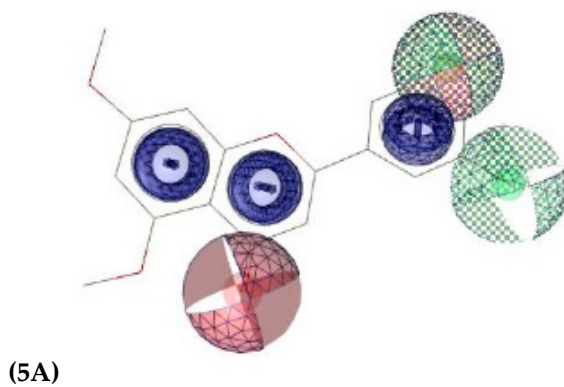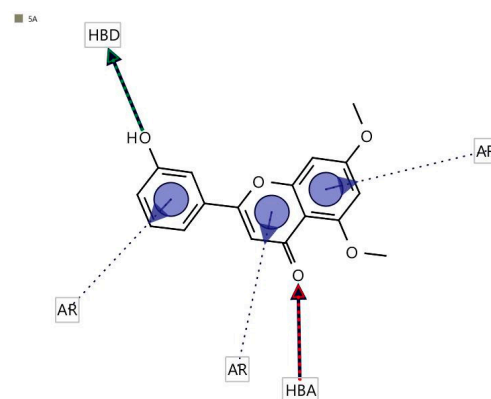

(5C)

(5D)

(5E)

(5F)

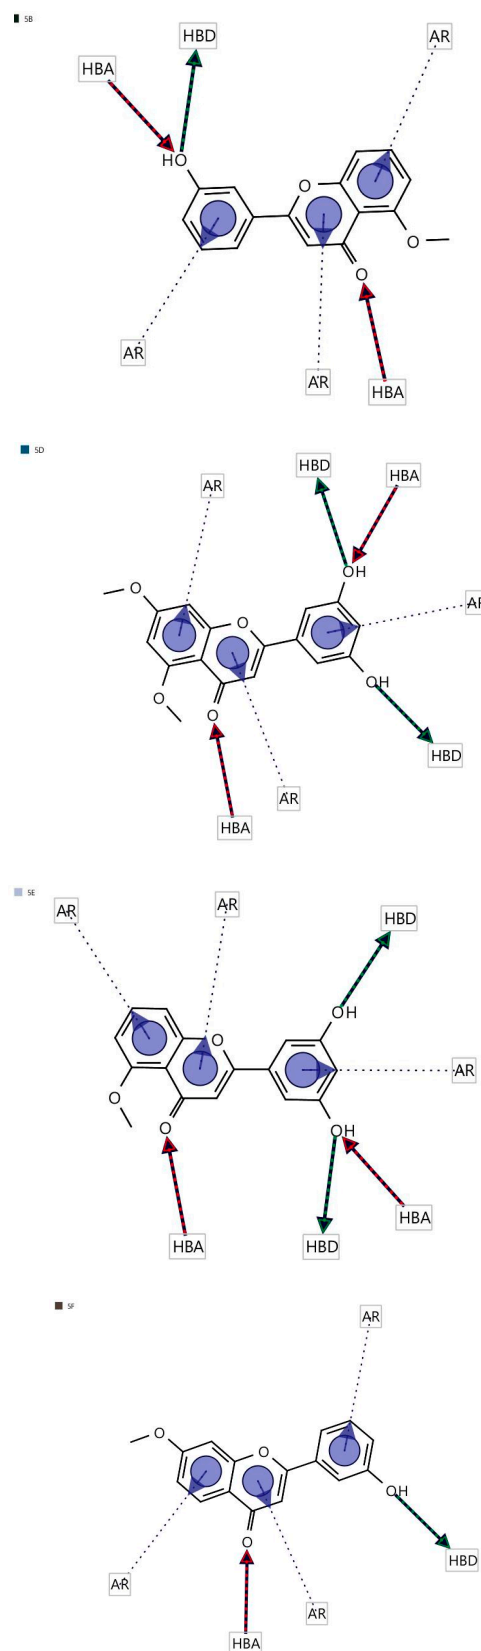

(5G)

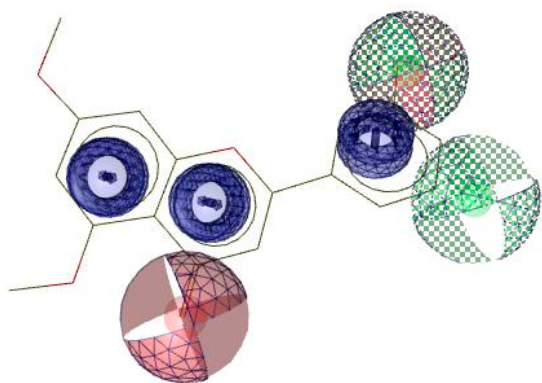

SG

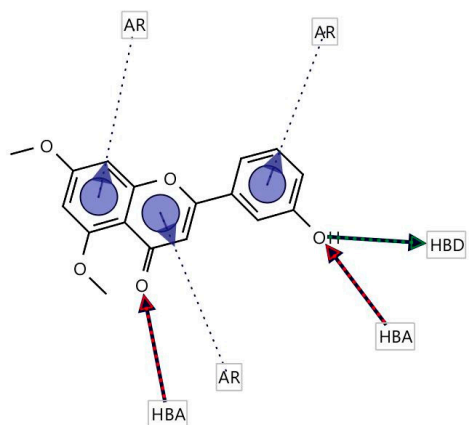

(5H)

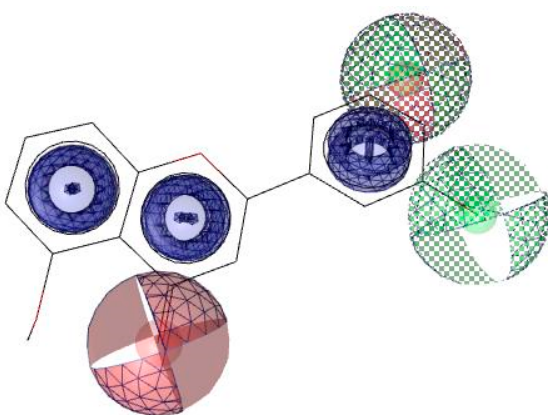

SH

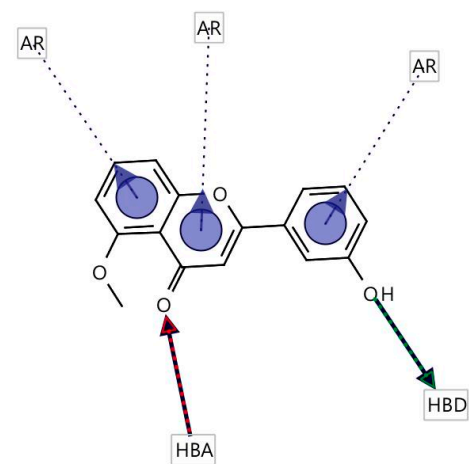

(5I)

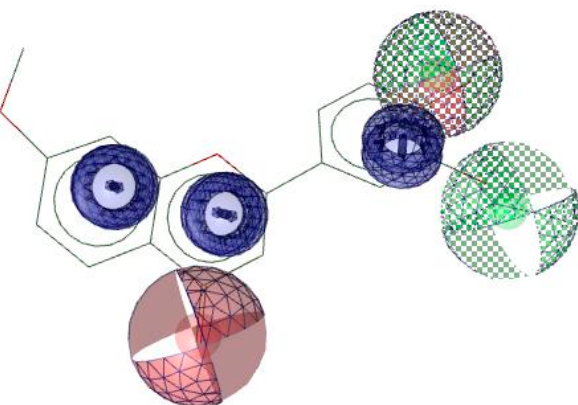

SI

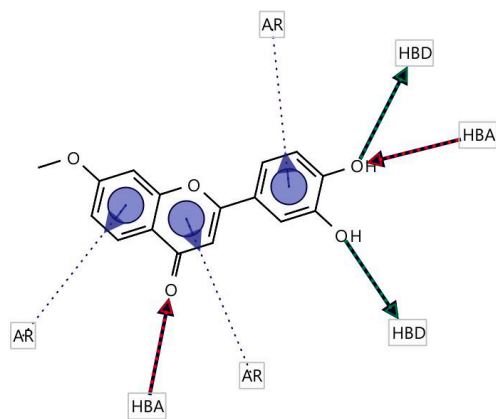

(5J)

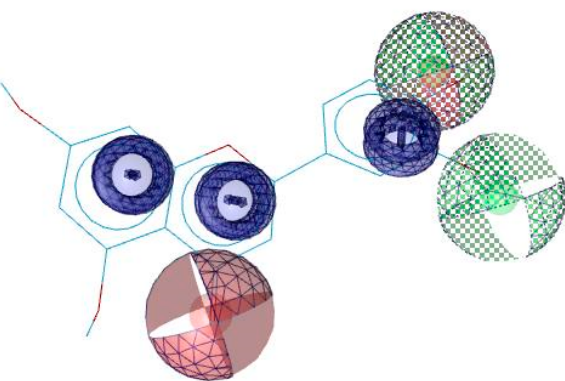

SI

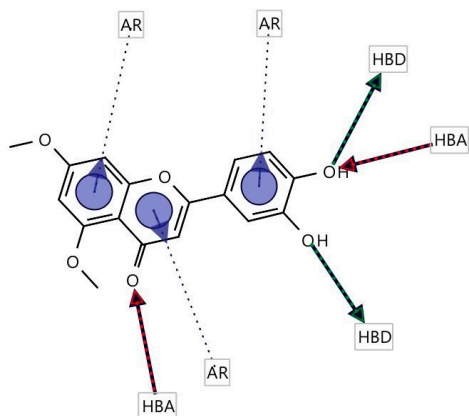



(5K)

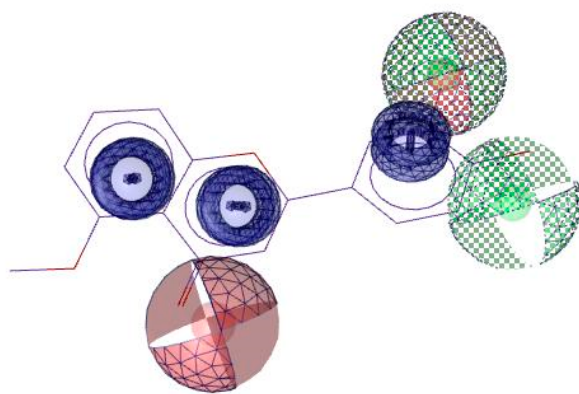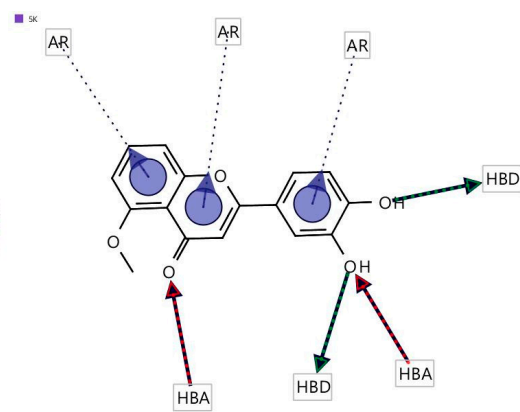

(5L)

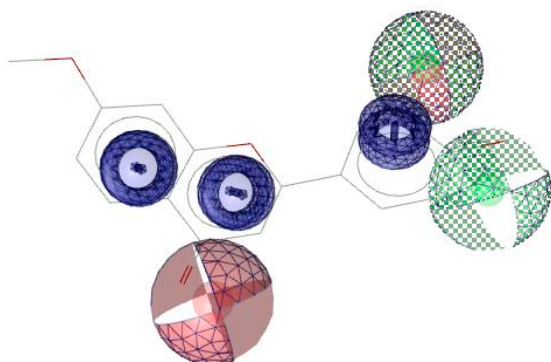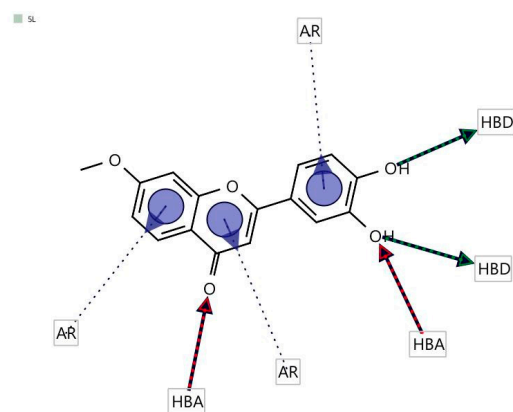

(5M)

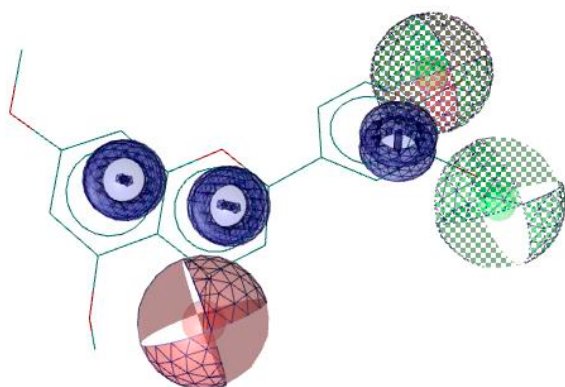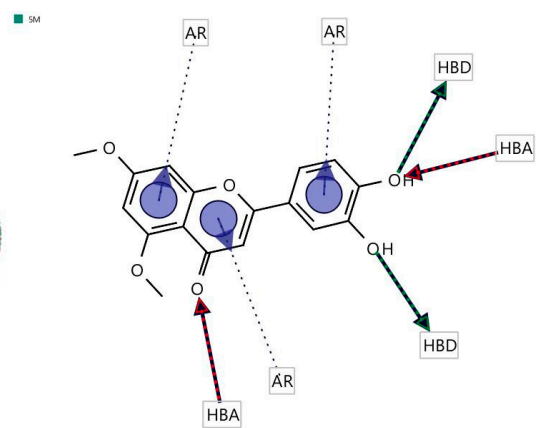

(5N)

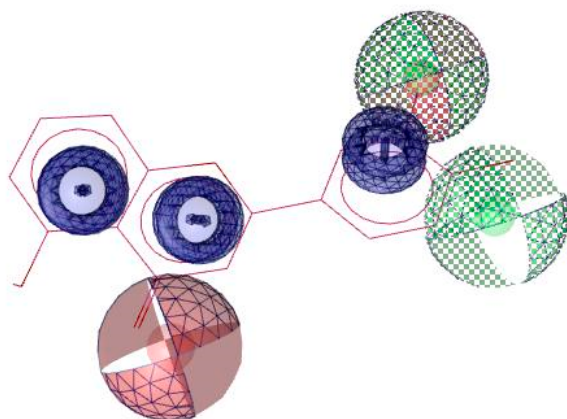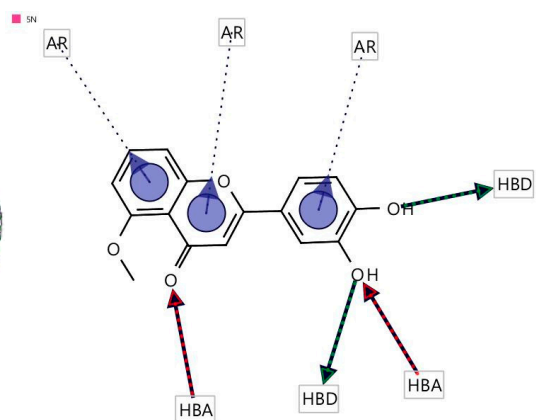

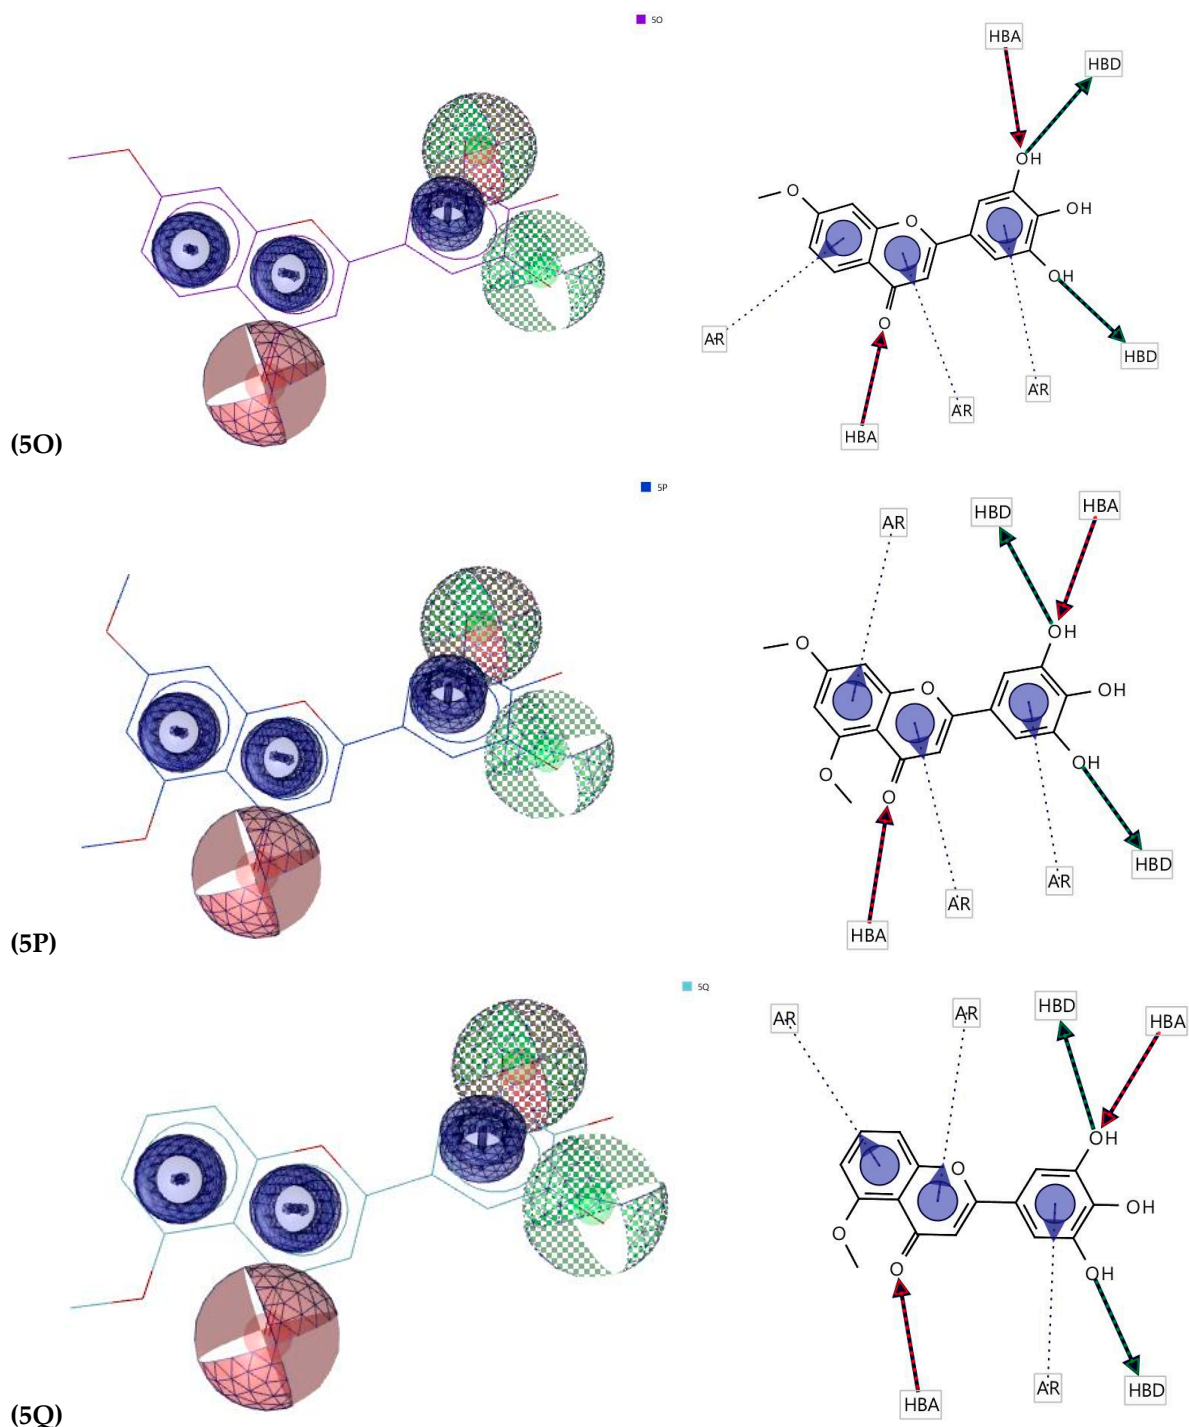

**Figure S4.** 3D and 2D representations of pharmacophoric features of the hypothetical compounds (5A – 5Q) used in 3D pharmacophore generation. Pharmacophoric features are color-coded with red, HBAs; green, HBDs; purple, AR.

**(Method S4.2) Protocol for determining the highest non-cytotoxic dose of the compounds by the MTT assay (Provided by Axonova)**

1. SH-SY5Y cells were passaged and seeded at a density of 10,000 cells/well overnight.
2. The next day, the cells were treated with 200  $\mu$ L of 100 pM to 10  $\mu$ M of compounds for 48 h.
3. After the treatment time, the compound was removed, and 100  $\mu$ L of 0.5 mg/mL of MTT dye was added for 2 h.



4. The MTT dye was removed, and 50  $\mu$ L of DMSO was then added.
5. Absorbance was measured at 450 nm.
6. The percentage cell viability was calculated as per the equation below:

$$\text{Cell viability (\%)} = \frac{(\text{Abs. of compound treated cells} - \text{Abs. of blank})}{(\text{Abs. of control cells} - \text{Abs. of blank})}$$

Dose-response curve was generated for each compound, and the highest non-cytotoxic concentration was determined based on the selection criterion of  $95 \pm 5$  % of cell viability.

**(Method S4.3) Protocol for shortlisting the hits candidate with neurotrophic activity (Provided by Axonova)**

1. SH-SY5Y cells were passaged and seeded at a confluency of 7,000 cells/well (500  $\mu$ L) in a 24-well TPP plate.
2. Following 24h of plating, cells were treated with 10  $\mu$ M of RA (retinoic acid) (500  $\mu$ L) in 10% FBS (fetal bovine serum) media for 3 days.
3. RA-treated cells were then incubated with 500  $\mu$ L of the highest non-cytotoxic concentration of the compounds, 10  $\mu$ M of RA, 50 ng/mL of BDNF (Brain-derived neurotrophic factor) or vehicle in 1% FBS media for an additional 3 days.
4. Following the incubation periods, cells treated with RA and BDNF were refreshed with 10  $\mu$ M of RA and 50 ng/mL BDNF for an additional 5 days. Cells treated with compounds were not refreshed with the compounds due to an observed cytotoxicity. Instead, these cells were incubated with 1% FBS media.
5. Images were captured on day 6 and day 10 of differentiation.
6. As a preliminary screening, the differentiation potential of the 80 compounds were compared to that of BDNF at day 6 of differentiation and were categorised as poor, medium, and high, as illustrated in Fig.S4.3.

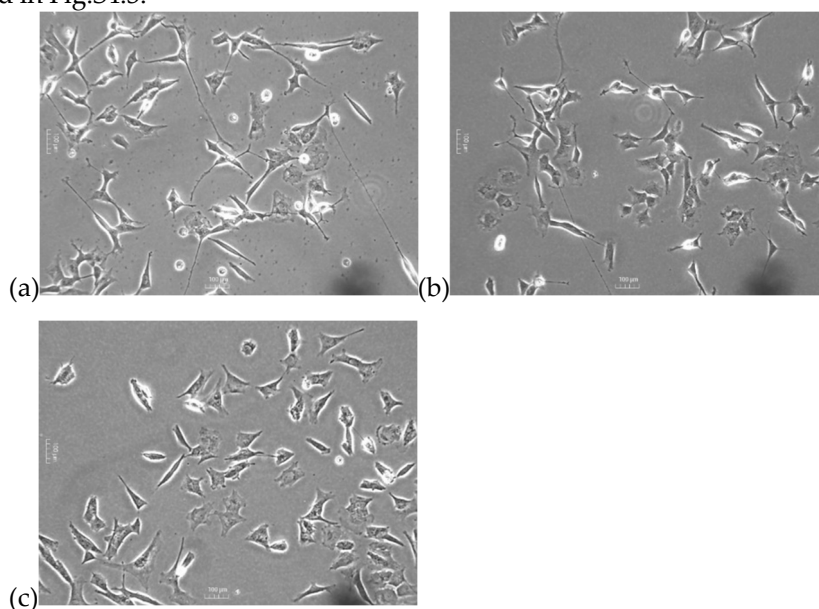

**Figure S4.3.** Representative figures of SH-SY5Y cells exposed to compound with (a) high, (b) medium and (c) poor differentiation abilities at day 6 of differentiation.

**(Method S4.4) Protocol for assessing the neurotrophic and synaptogenic activities of the hit candidates by HCS (Provided by Axonova)**

1. SH-SY5Y cells were passaged and seeded at a confluency of 3,000 cells/well (100  $\mu$ L) in a 96-well TPP plate

- Following 24h of plating, cells were treated with 10  $\mu$ M of RA (100  $\mu$ L) in 10% FBS media for 3 days.
- RA-treated cells were then incubated with 100  $\mu$ L of the highest non-cytotoxic concentration as well as 2 doses below the non-cytotoxic concentration of the compounds, 10  $\mu$ M of RA, 50 ng/mL of BDNF or vehicle in 1% FBS media for an additional 3 days.
- Following the incubation periods, cells treated with RA and BDNF were refreshed with 10  $\mu$ M of RA and 50 ng/mL BDNF for an additional 5 days. Cells treated with compounds were not refreshed with the compounds due to an observed cytotoxicity. Instead, these cells were incubated with 1% FBS media.
- Differentiation was stopped after 5 days.
- The cells were washed with PBS, fixed with 50  $\mu$ L of 3.7% formaldehyde for 15 mins and washed twice with PBS.
- The cells were then permeabilised with 50  $\mu$ L of permeabilisation reagent (0.1% Triton® X-100 in PBS) for 15 mins, followed by washing.
- The cells were blocked with 50  $\mu$ L of blocking solution comprising 1% BSA, 22.52 mg/mL glycine in PBST (PBS+ 0.1% Tween 20) for 30 min.
- The cells were then incubated with the primary antibodies (diluted in 1% BSA in PBST) overnight at 4 °C, as per Table S4.4.
- The next day, the cells were washed thrice with PBS and incubated with 1  $\mu$ g/mL Hoechst and the secondary antibody (in 1% BSA in PBST), for 1 h at room temperature in the dark, as per Table S4.4.
- After 1 h, the cells were washed thrice with PBS.
- Images of the fluorescently tagged cells were captured and analysed by the HCS CX5.

**Table S4.4** Primary and secondary antibodies are used for assessing neuronal differentiation and synaptogenesis

| Marker                                                       | Primary antibody          | Dilution | Secondary antibody                 | Dilution |
|--------------------------------------------------------------|---------------------------|----------|------------------------------------|----------|
| Neuronal differentiation- neuronal marker                    | Rabbit anti-TUBB3         | 1:500    | Donkey anti-rabbit Alexa Fluor 488 | 1:1000   |
| Neuronal differentiation and synaptogenesis- dendrite marker | Chicken anti-MAP2         | 1:5000   | Goat anti-chicken Alexa Fluor 594  | 1:1000   |
| Synaptogenesis- presynaptic marker                           | Rabbit anti-Synaptophysin | 1:200    | Donkey anti-rabbit Alexa Fluor 488 | 1:1000   |
| Synaptogenesis- post-synaptic marker                         | Mouse anti-PSD95          | 1:200    | Goat anti-mouse Alexa Fluor 750    | 1:1000   |

**(Method S4.5) Compound and insult treatment on differentiated SH-SY5Y cells (Provided by Axonova)**

- Following the differentiation of cells, the latter were pre-treated with the highest non-toxic dose of the hit compounds for 24 h.
- The cells were then exposed to the A $\beta$  25-35, A $\beta$  1-40, A $\beta$  1-42, glutamate and H<sub>2</sub>O<sub>2</sub> at the respective dose as listed in Table S4.5.
- After 72 h, the parameters listed below were assessed.

**Table S4.5** The concentration of insults used for assessing the neuroprotective activity of the hit compounds

| Insult | Concentration | Treatment time |
|--------|---------------|----------------|
|--------|---------------|----------------|

|                               |             |      |
|-------------------------------|-------------|------|
| A $\beta$ 25-35               | 40 $\mu$ M  | 72 h |
| A $\beta$ 1-40                | 35 $\mu$ M  | 72 h |
| A $\beta$ 1-42                | 20 $\mu$ M  | 72 h |
| Glutamate                     | 100 mM      | 72 h |
| H <sub>2</sub> O <sub>2</sub> | 100 $\mu$ M | 72 h |

**(Method S4.5.1) Assessment of cell viability and ROS production** (Provided by Axonova)

- After 72 h, the cells were stained with 1  $\mu$ g/mL of Hoechst 33342 (nuclear staining), 1  $\mu$ g/mL of propidium iodide (staining of dead cells) and 5  $\mu$ M of CellROX™ Deep Red Reagent (ROS marker).
- The plate was then read using the HCS CX5 at a magnification of 10x.
- The number of nuclei of live and dead cells and the fluorescence intensity of CellROX™ Deep Red Reagent were determined by the HCS.

**(Method S4.5.2) Determination of neurite loss** (Provided by Axonova)

- Following extract and insult treatment, the cells were washed with PBS, fixed with 60  $\mu$ L of 3.7% formaldehyde for 15 mins and washed twice with PBS.
- The cells were then permeabilised with 60  $\mu$ L of permeabilisation reagent (0.1% Triton® X-100 in PBS) for 15 mins, followed by washing.
- The cells were blocked with 60  $\mu$ L of blocking solution comprising 1% BSA, 22.52 mg/mL glycine in PBST (PBS+ 0.1% Tween 20) for 30 min.
- The cells were then incubated with the TUBB3 primary antibody (diluted in 1% BSA in PBST) overnight at 4 °C, as per Table S.4.5.2
- The next day, the cells were washed thrice with PBS and incubated with 1  $\mu$ g/mL Hoechst and the secondary antibody (in 1% BSA in PBST), for 1 h at room temperature in the dark, as per Table S.4.5.2
- After 1 h, the cells were washed thrice with PBS.
- Images of the fluorescently tagged cells were captured and analysed by the HCS CX5.
- The neurite length and number were then determined.

Table S.4.5.2 Primary and secondary antibodies used during the study

| Marker                                    | Primary antibody         | Dilution | Secondary antibody                 | Dilution |
|-------------------------------------------|--------------------------|----------|------------------------------------|----------|
| Neuronal differentiation- neuronal marker | Rabbit anti-TUBB3        | 1:500    | Donkey anti-rabbit Alexa Fluor 488 | 1:1000   |
| Anti-inflammatory marker                  | Rabbit anti-Nrf2         | 1:1000   | Donkey anti-rabbit Alexa Fluor 488 | 1:1000   |
| Pro-inflammatory marker                   | Mouse anti-NF $\kappa$ B | 1:1000   | Goat anti-mouse Alexa Fluor 750    | 1:1000   |

**(Method S4.5.3) Investigation of secretion of TNF $\alpha$  and IL-1 $\beta$**  (Provided by Axonova)

- Following extract and insult treatment, the supernatant was collected, and ELISA was carried out as per the manufacturer's protocol.
- The Greiner plate was coated with 100  $\mu$ L of either TNF $\alpha$  (DY210-05) or IL-1 $\beta$  (DY201-05) capture antibody overnight.
- Following 3 times washing with wash buffer, the wells were blocked using 300  $\mu$ L of reagent diluent for 1 h.

- iv. The plates were washed thrice, after which 100  $\mu\text{L}$  of sample or standard was added for 2 h.
- v. After washing the plates 3 times, 100  $\mu\text{L}$  of detection antibody was added for 2 h.
- vi. Prior to and after the addition of 100  $\mu\text{L}$  of Streptavidin-HRP for 20 mins, the wells were washed three times.
- vii. A total of 100  $\mu\text{L}$  of TMB solution was added to each well for 20 mins, after which 2N HCl was added to stop the reaction.
- viii. The absorbance was measured at 450 nm, and the level of  $\text{TNF}\alpha$  and  $\text{IL-1}\beta$  was calculated following the plotting of the standard curves (Fig.S.4.5.3)

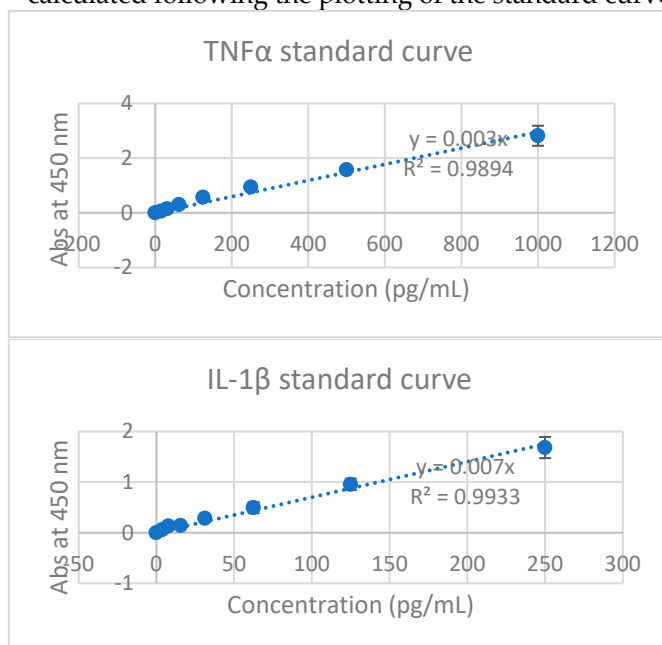

**Figure S.4.5.3 (a)  $\text{TNF}\alpha$  and (b)  $\text{IL-1}\beta$  standard curves.**
